# Supplementary material for: Effects of calcium dobesilate (CaD) interference on serum creatinine measurements: a national External Quality Assessment (EQA)-based educational survey of drug-laboratory test interactions
Source: publisher site journal article supplement (doi:10.1515/cclm-2020-0424), 2020-07-12
Supplement: Supplementary file 1 [file j_cclm-2020-0424_suppl.pdf]

## Questionnaire

### Calcium Dobesilate Interference on Clinical Serum Creatinine Testing

#### Introduction

The purpose of this questionnaire is to gather information about the awareness of clinicians and technicians on drug-laboratory test interactions. This information will be used to improve the quality of serum creatinine measurements in clinical laboratories.

All questions are voluntary and your individual responses will remain confidential. Please take the time to complete this questionnaire as completely and accurately as possible.

The survey consists of 6 questions. It might take you about 5 minutes to complete. Thank you for taking the time to complete this survey.

#### Please provide your basic information.

Hospital / Institution: \_\_\_\_\_  
Division: \_\_\_\_\_  
Position Title: \_\_\_\_\_

#### 1. Please state the principles of serum creatinine testing in your laboratory. (Multiple-choice)

- A. Jaffé (kinetic alkaline picrate) method
- B. Sarcosine oxidase enzymatic assay
- C. Iminohydrolase and glutamate dehydrogenase enzymatic assay
- D. Dry chemistry
- E. Others

#### 2. Do the physicians prescribe “Calcium Dobesilate” in your hospital/institution? (Single-choice)

- A. Yes.
- B. No.
- C. I'm not sure.

#### 3. Do you know Calcium Dobesilate may affect the serum creatinine test results? (Single-choice)

- A. Yes, I know.
- B. I've heard of it but I don't know much about the details.
- C. No.

**4. Have you ever encountered a case of interference with Calcium Dobesilate in your practice?**

- A. Yes. The case was verified by evaluation of clinical medication.
- B. Probably, but it was not verified.
- C. No.

**5. Have you ever received complaints against the unexplained decrease of serum creatinine level or the questionable result interpretation which was not inconsistent with clinical symptoms after excluded the factors of internal quality control, external quality control and instrument maintenance? (Single-choice)**

- A. Yes.
- B. No.

**6. In that case, what is your strategy to deal with it? (Multiple-choice)**

- A. Re-test the original sample.
- B. Request for another blood specimen collection and test again.
- C. Re-test and inform the physicians
- D. Re-test with other reagent kits or platform
- E. Others, Please specify
